# Supplementary material
Source: publisher site journal article supplement (https://www.dovepress.com/article/219595)
Supplement: Supplementary file 1 [file get_supplementary_file.php]

Supplemental figures as tif

**Figure S1. LYFO study population profile**

**
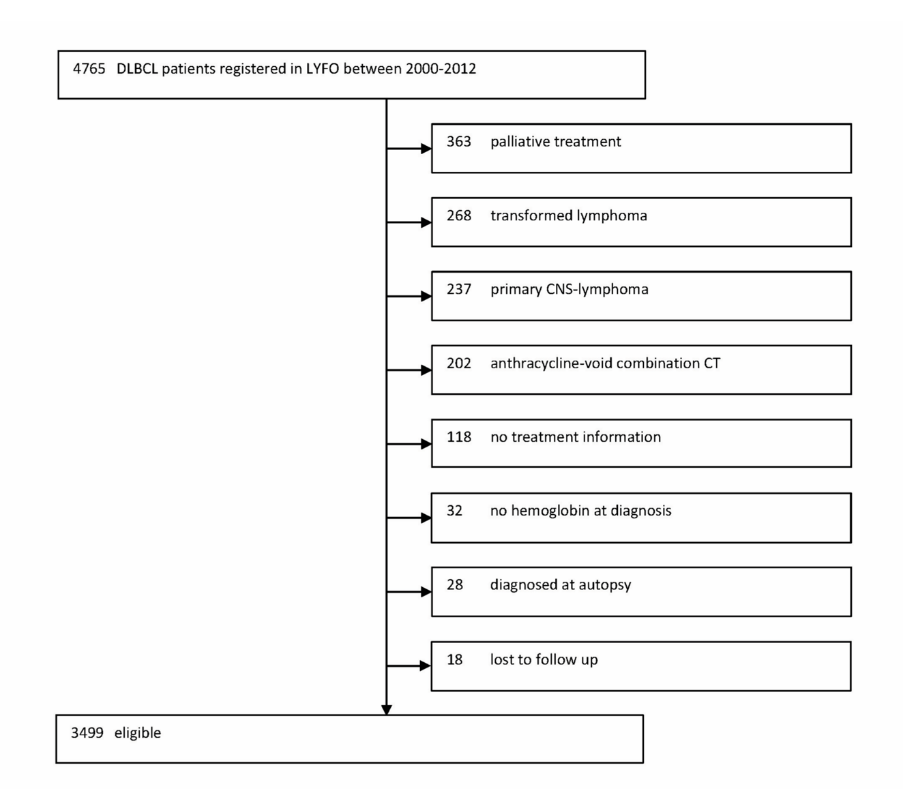
**

Abbreviations**:** LYFO; Danish Lymphoma Registry. CT; Chemotherapy.

**Figure S2. Distribution of hemoglobin for male (A) and female (B) patients in the training set**

**
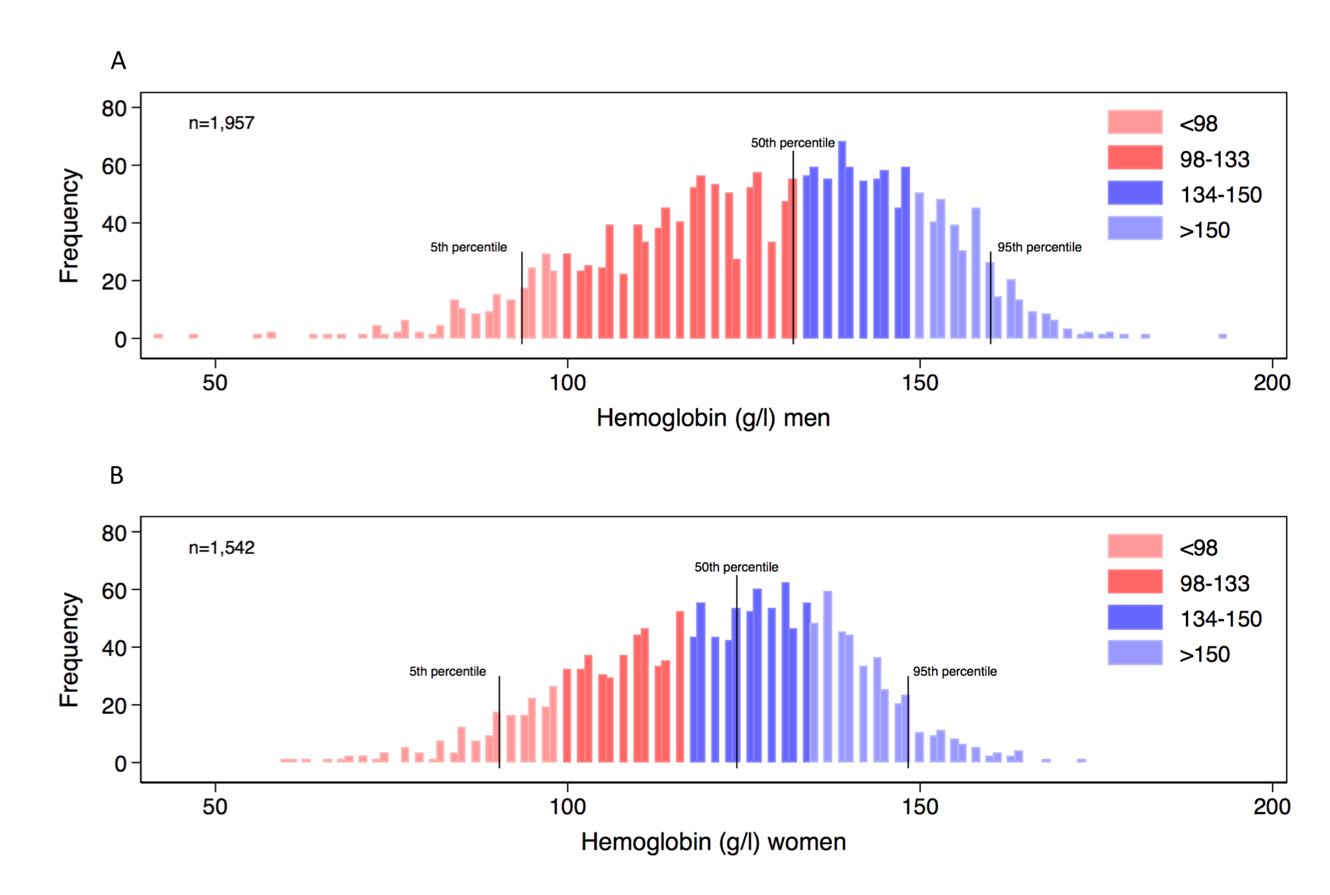
**

Abbreviations: Hgb; Hemoglobin.

**Figure S3. Distribution of hemoglobin for male (A) and female (B) patients in the validation set**


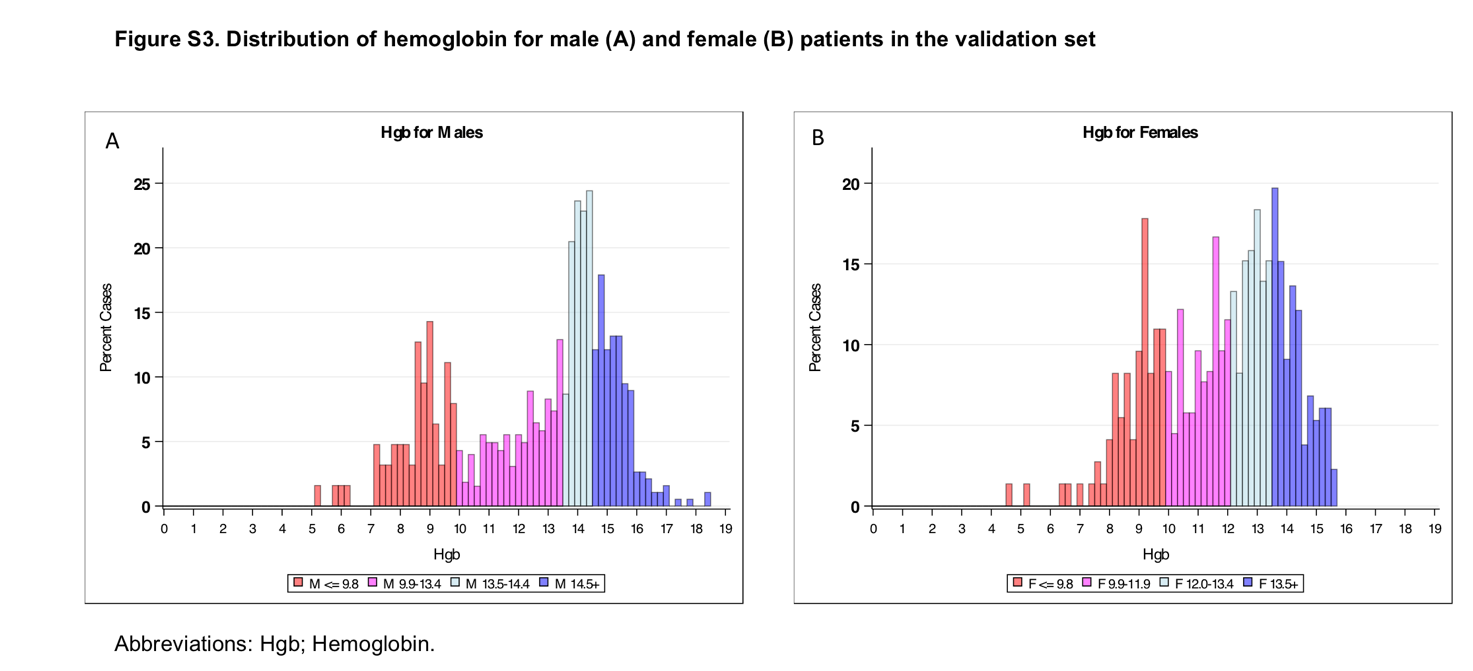


Abbreviations: Hgb; Hemoglobin.

**Figure S4. Overall survival according to hemoglobin groups (validation set)**
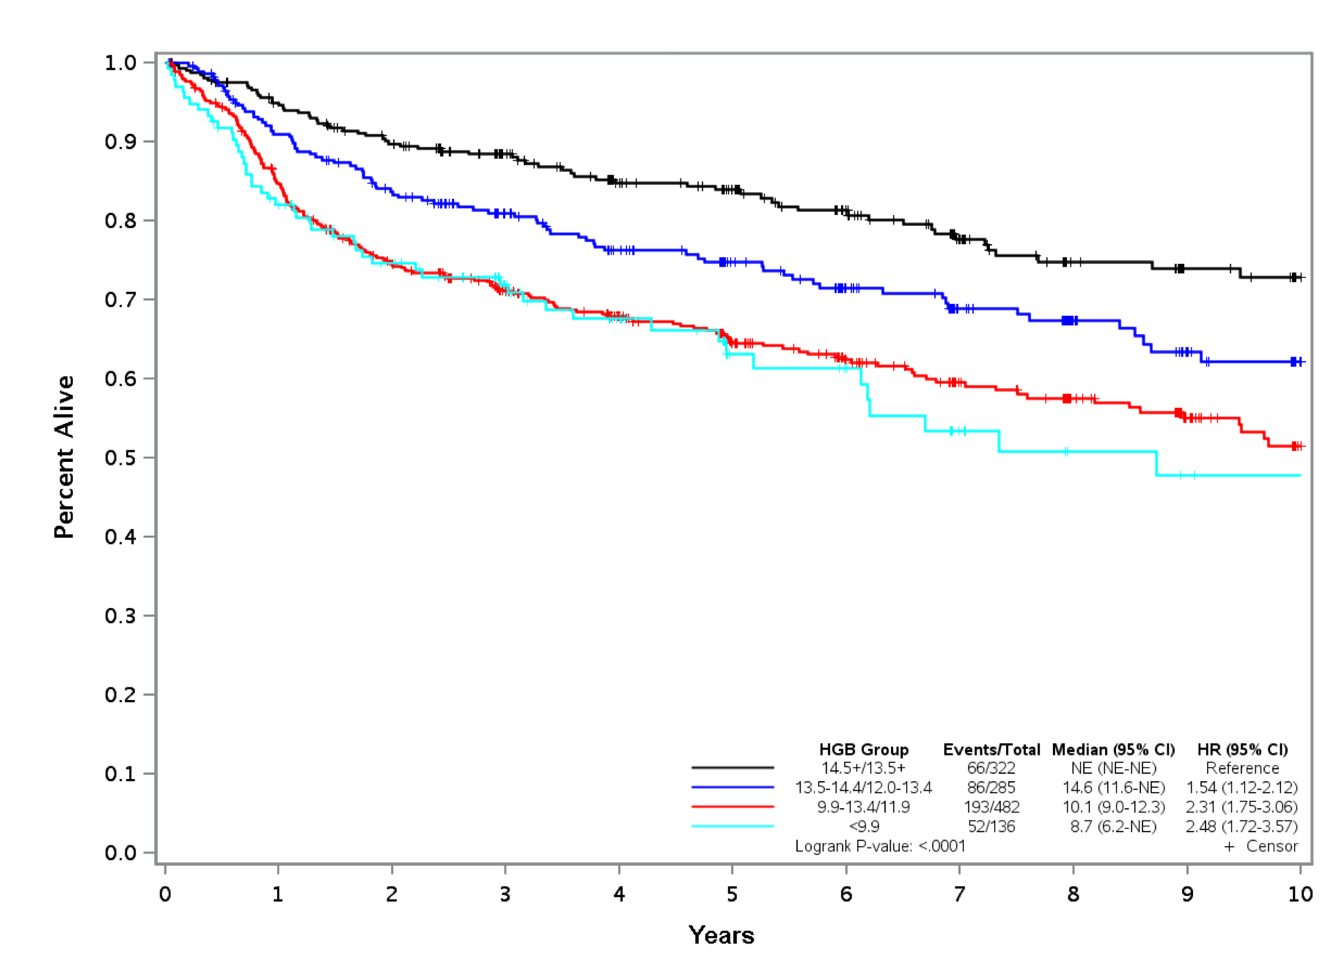


Abbreviations: Hgb; Hemoglobin. CI; confidence interval.

**Figure S5. Overall survival for low/low-intermediate (A) or high intermediate/high NCCN-IPI (B) according to hemoglobin group (validation set)**


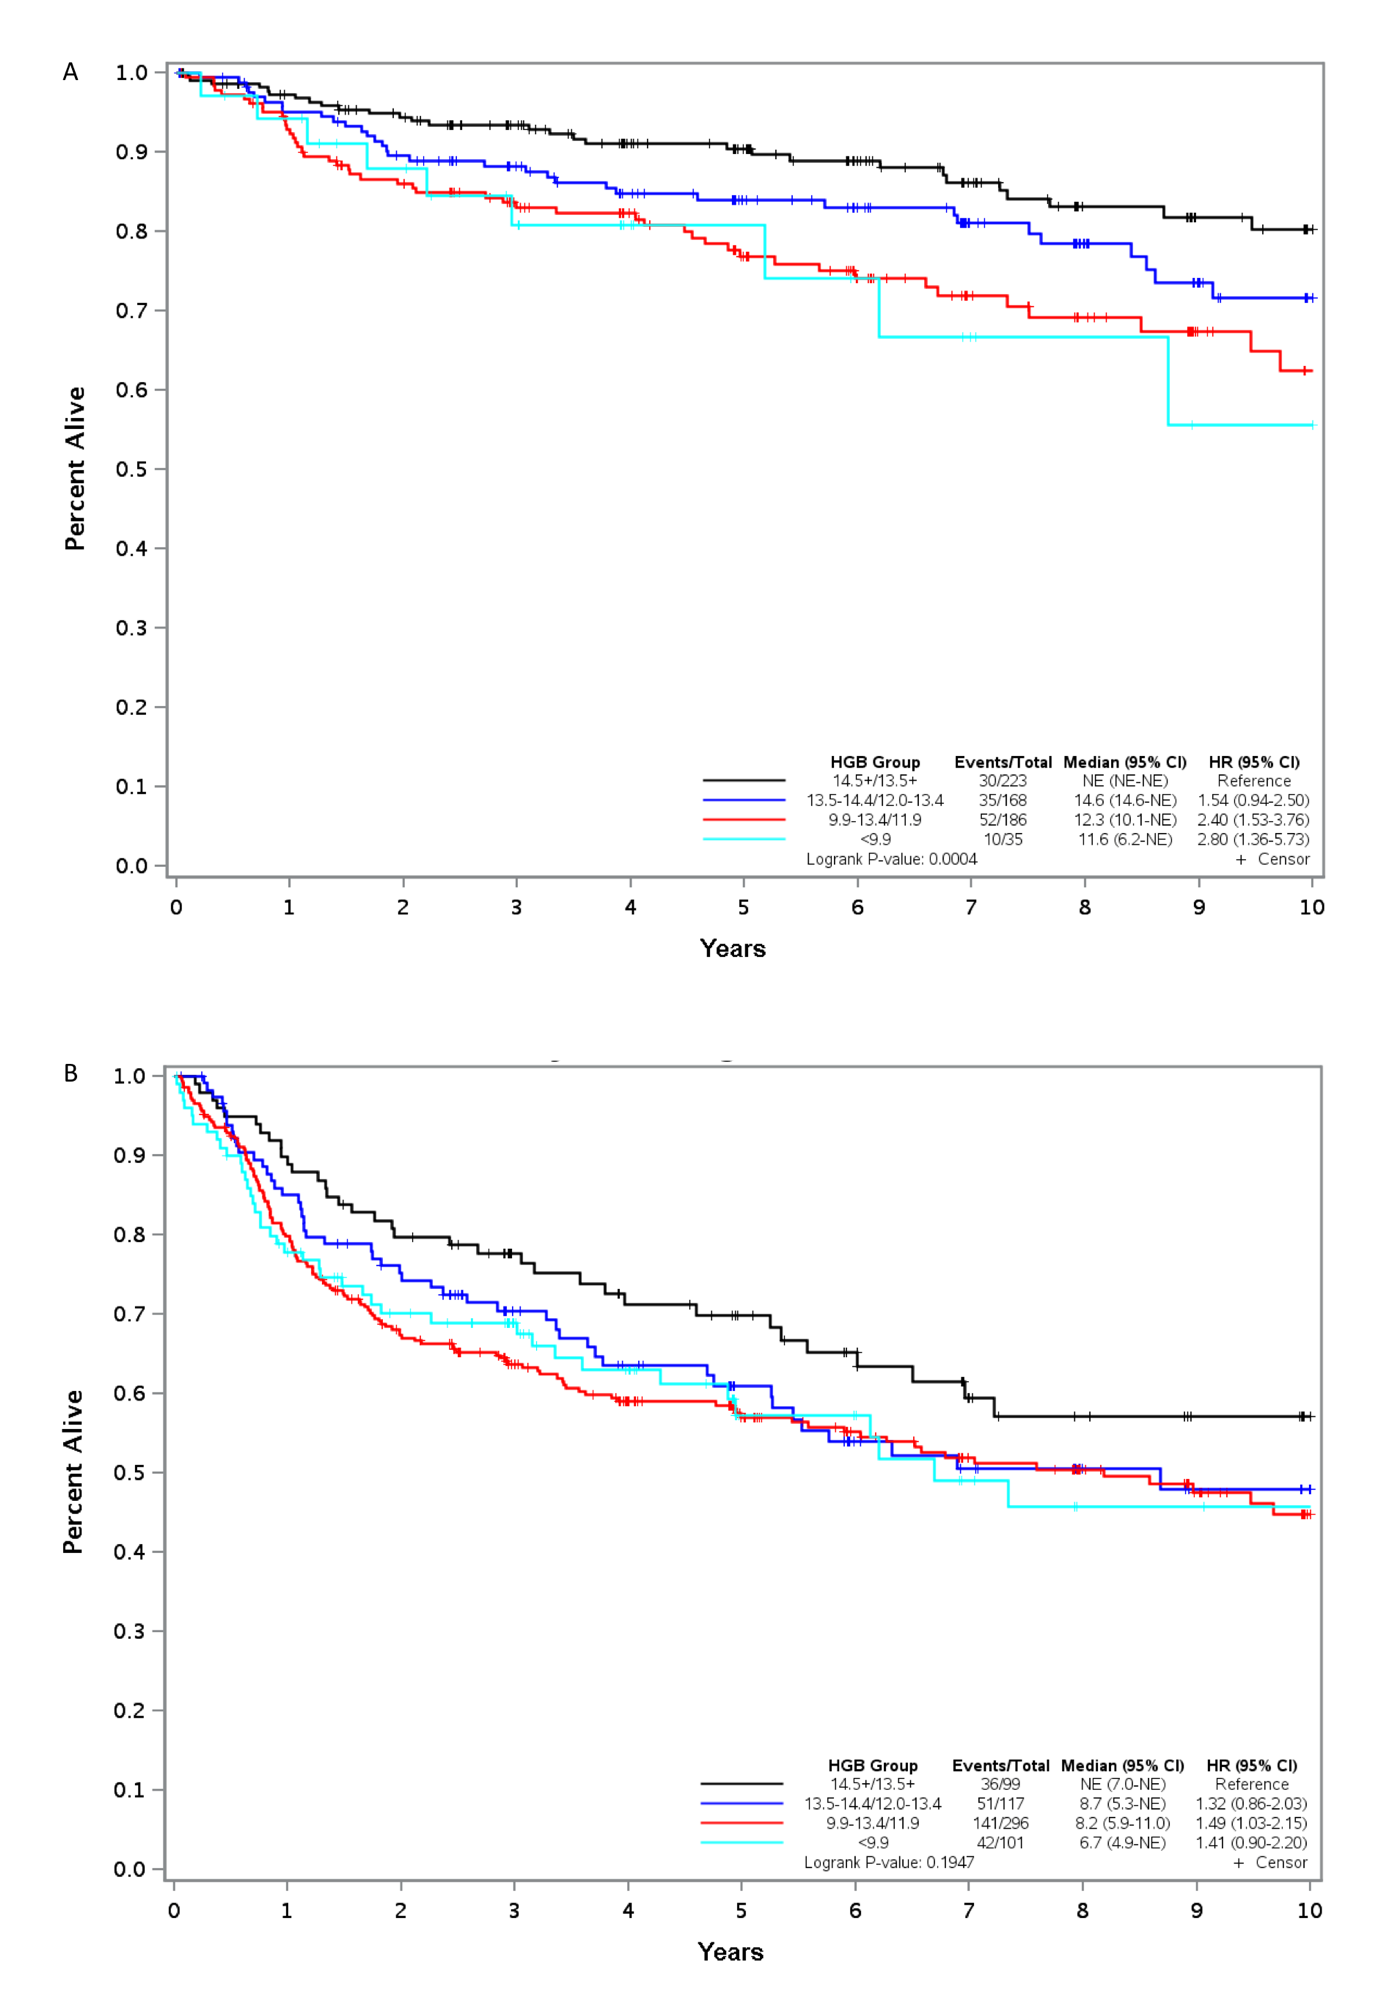


Abbreviations: Hgb; Hemoglobin. CI; confidence interval.

**Table S1. Crude and adjusted HRs in the multiple imputation model according to Hgb subgroups, n=3531**

|  |  | Hgb |  |  |
| --- | --- | --- | --- | --- |
|  | >149/>134‡ | 134-149/118-134† | 98-133/98-117† | <98 |
| Crude HRs (95% CI) | 1.00 (ref) | 1.53 (1.26 - 1.85) | 2.74 (2.29 - 3.28) | 4.52 (3.68 - 5.55) |
| Adjusted HRs (95% CI) | 1.00 (ref) | 1.22 (1.00 - 1.42) | 1.51 (1.25 - 1.82) | 2.03 (1.64 - 2.52) |

Imputation were done for both Hgb and missing NCCN factors (LDH, Ann arbor, PS, extra nodal disease)

‡ Hgb cut off value for men/Hgb cut off value for women, † Hgb range for men/Hgb range for women

Abbreviations: Hgb; Hemoglobin. HRs; hazard rate ratios.

**Table S2. Patient Characteristics for the validation cohort by hemoglobin group**

|  | >145/>135 | | 135-144/120-134 | | 99-134/99-119 | | <99 | | Total | |
| --- | --- | --- | --- | --- | --- | --- | --- | --- | --- | --- |
| **Age, median (range)** | 61.0 (18-89) | | 65.0 (18-93) | | 63.0 (18-92) | | 65.0 (19-90) | | 63.0 (18-93) | |
| **Age category** | No. | % | No. | % | No. | % | No. | % | No. | % |
| ≤40 | 26 | (8.1%) | 24 | (8.4%) | 42 | (8.7%) | 6 | (4.4%) | 98 | (8.0%) |
| 41-60 | 127 | (39.4%) | 83 | (29.1%) | 155 | (32.2%) | 47 | (34.6%) | 412 | (33.6%) |
| 61-75 | 124 | (38.5%) | 126 | (44.2%) | 194 | (40.2%) | 61 | (44.9%) | 505 | (41.2%) |
| >76 | 45 | (14.0%) | 52 | (18.2%) | 91 | (18.9%) | 22 | (16.2%) | 210 | (17.1%) |
| **Sex** |  |  |  |  |  |  |  |  |  |  |
| Women | 132 | (41.0%) | 158 | (55.4%) | 156 | (32.4%) | 73 | (53.7%) | 519 | (42.4%) |
| Men | 190 | (59.0%) | 127 | (44.6%) | 326 | (67.6%) | 63 | (46.3%) | 706 | (57.6%) |
| **Ann Arbor stage** |  |  |  |  |  |  |  |  |  |  |
| I-II | 162 | (50.5%) | 128 | (44.9%) | 118 | (24.5%) | 22 | (16.2%) | 430 | (35.1%) |
| III-IV | 159 | (49.5%) | 157 | (55.1%) | 364 | (75.5%) | 114 | (83.8%) | 794 | (64.9%) |
| Missing | 1 |  | 0 |  | 0 |  | 0 |  | 1 |  |
| **High-risk extra nodal disease** |  |  |  |  |  |  |  |  |  |  |
| No | 246 | (76.4%) | 212 | (74.4%) | 277 | (57.5%) | 52 | (38.2%) | 787 | (64.2%) |
| Yes | 76 | (23.6%) | 73 | (25.6%) | 205 | (42.5%) | 84 | (61.8%) | 438 | (35.8%) |
| **NCCN-IPI LDH Ratio** |  |  |  |  |  |  |  |  |  |  |
| ≤1.0 | 189 | (61.4%) | 144 | (52.9%) | 159 | (34.6%) | 33 | (25.6%) | 525 | (44.9%) |
| 1.1-3.0 | 108 | (35.1%) | 115 | (42.3%) | 238 | (51.9%) | 69 | (53.5%) | 530 | (45.4%) |
| ≥3.1 | 11 | (3.6%) | 13 | (4.8%) | 62 | (13.5%) | 27 | (20.9%) | 113 | (9.7%) |
| Missing | 14 |  | 13 |  | 23 |  | 7 |  | 57 |  |
| **Performance status** |  |  |  |  |  |  |  |  |  |  |
| 0-1 | 297 | (92.2%) | 253 | (88.8%) | 371 | (77.1%) | 83 | (61.9%) | 1,004 | (82.2%) |
| ≥2 | 25 | (7.8%) | 32 | (11.2%) | 110 | (22.9%) | 51 | (38.1%) | 218 | (17.8%) |
| Missing | 0 |  | 0 |  | 1 |  |  | 2 | 3 |  |
| **NCCN-IPI risk group** |  |  |  |  |  |  |  |  |  |  |
| Low | 67 | (20.8%) | 35 | (12.3%) | 24 | (5.0%) | 4 | (2.9%) | 130 | (10.6%) |
| Low-intermediate | 156 | (48.4%) | 133 | (46.7%) | 162 | (33.6%) | 31 | (22.8%) | 482 | (39.3%) |
| High-intermediate | 89 | (27.6%) | 103 | (36.1%) | 242 | (50.2%) | 66 | (48.5%) | 500 | (40.8%) |
| High | 10 | (3.1%) | 14 | (4.9%) | 54 | (11.2%) | 35 | (25.7%) | 113 | (9.2%) |
| **Comorbidity** |  |  |  |  |  |  |  |  |  |  |
| None | 199 | (61.8%) | 174 | (61.1%) | 259 | (53.7%) | 69 | (50.7%) | 701 | (57.2%) |
| present | 60 | (18.6%) | 48 | (16.8%) | 98 | (2.3%) | 29 | (21.3%) | 235 | (19.2%) |
| Missing | 63 | (19.6%) | 63 | (22.1%) | 125 | (25.9%) | 38 | (27.9%) | 289 | (23.6%) |
| **Total** | 322 | (100%) | 285 | (100%) | 482 | (100%) | 136 | (100%) | 1,225 | (100%) |

‡ Hgb cut off value for men/Hgb cut off value for women, † Hgb range for men/Hgb range for women

Abbreviations: Hgb; Hemoglobin. NCCN-IPI; National Comprehensive Cancer Network International Prognostic Index. High risk extra nodal disease; presence of extra nodal lymphomatous involvement in bone marrow, CNS, liver/GI tract, or lung. LDH; lactate dehydrogenase.

**Table S3. Cell of origin in a subset of the validation cohort according to Hgb**

|  |  | |  | | Hgb (g/L) | |  | |  | |
| --- | --- | --- | --- | --- | --- | --- | --- | --- | --- | --- |
|  | >145/>135 | | 135-144/120-134 | | 99-134/119 | | <99 | | Total | |
| GCB | 179 | (74.6) | 130 | (66.0) | 196 | (59.2) | 45 | (50.6) | 550 | (64.2) |
| non-GCB | 61 | (25.4) | 67 | (34.0) | 135 | (40.8) | 44 | (49.4) | 307 | (35.8) |
| Total | 240 | (100) | 197 | (100) | 331 | (100) | 89 | (100) | 857 | (100) |

Abbreviations: Hgb; Hemoglobin. GCB; germinal center B-cell like.
